# Supplementary material for: Enhanced photocatalytic activity on polarized ferroelectric KNbO3
Source: Royal Society of Chemistry journal article supplement (doi:10.1039/c6ra23344a), 2016-01-01
Supplement: c6ra23344a1.pdf [file c6ra23344a1.pdf]

## Supporting Information

### Enhanced photocatalytic activity on polarized ferroelectric KNbO<sub>3</sub>

Qiang Fu,<sup>a,b</sup> Xianjie Wang,<sup>a\*</sup> Changyu Li,<sup>c</sup> Yu Sui,<sup>a</sup> Yaping Han,<sup>b</sup> Zhe Lv,<sup>a</sup> Bo Song,<sup>a,d</sup> and Ping Xu<sup>e\*</sup>

- Department of physics, Harbin Institute of Technology, Harbin 150001, China. \*Email: [wangxianjie@hit.edu.cn](mailto:wangxianjie@hit.edu.cn)
- Department of physics, Northeast Forestry University, Harbin 150040, China.
- Material Science and Engineering College, Northeast Forestry University, Harbin 150040, China
- Academy of Fundamental and Interdisciplinary Sciences, Harbin Institute of Technology, Harbin 150001, China.
- School of Chemistry and Chemical Engineering, Harbin Institute of Technology, Harbin 150001, China. \*Email: [pxu@hit.edu.cn](mailto:pxu@hit.edu.cn)

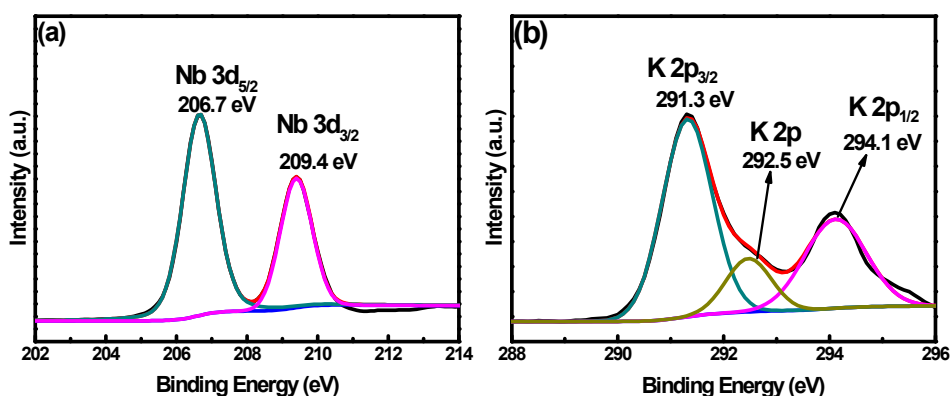

Fig. S1 XPS spectra of the prepared KNbO<sub>3</sub>, (a) Nb 3d core-level, (b) K 2p core level.

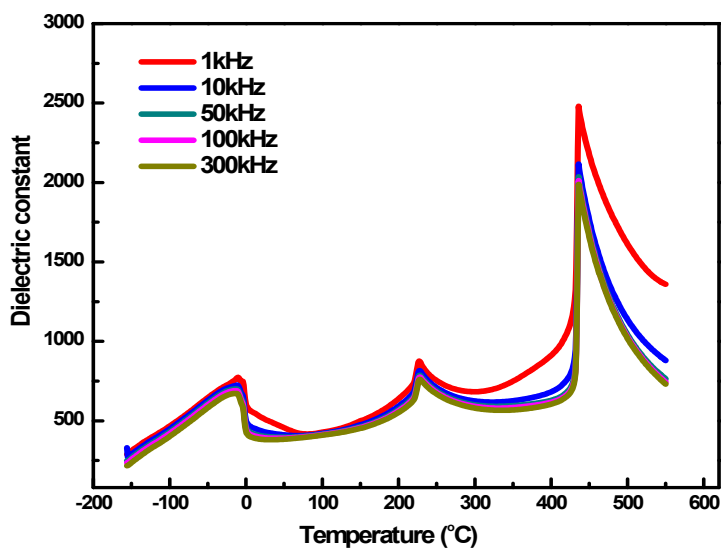

Fig. S2 Temperature dependence of dielectric constant of KNbO<sub>3</sub>

**Table S1.** The lattice parameters, the ratio of I(220)/I(002) and the  $d_{33}$  of the samples with different polarization fields

| Polarization Field (kV/cm) | a (Å) | b (Å) | c (Å) | I(220)/I(002) | $d_{33}$ |
|----------------------------|-------|-------|-------|---------------|----------|
| 0                          | 3.978 | 5.698 | 5.720 | 1.40          | --       |
| 5                          | 3.974 | 5.694 | 5.721 | 2.81          | 27       |
| 10                         | 3.970 | 5.689 | 5.722 | 2.74          | 40       |
| 15                         | 3.966 | 5.687 | 5.724 | 3.03          | 46       |

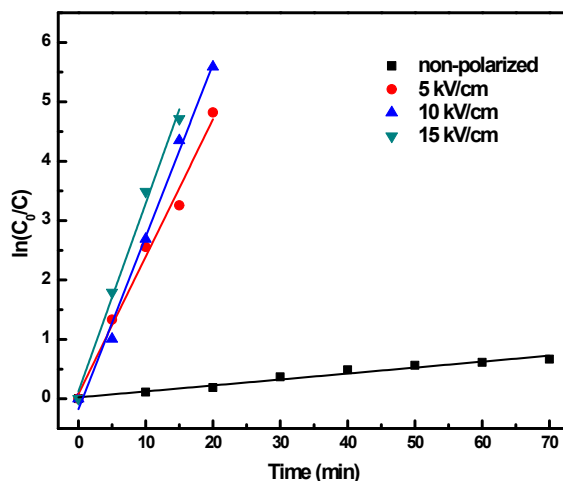

**Fig.S3** Fitted plot of  $\ln(C/C_0)$  versus time for the photodegradation of RhB

Table S2. Obtained  $k_{obs}$  from the fitted linear plot of  $\ln(C/C_0)$  vs  $t$

| Catalyst          | Polarization Voltage (kV/cm) | $k_{obs}(\text{min}^{-1})$ | $R^2$ |
|-------------------|------------------------------|----------------------------|-------|
| KNbO <sub>3</sub> | 0                            | 0.010                      | 0.97  |
|                   | 5                            | 0.231                      | 0.99  |
|                   | 10                           | 0.290                      | 0.99  |
|                   | 15                           | 0.317                      | 0.99  |

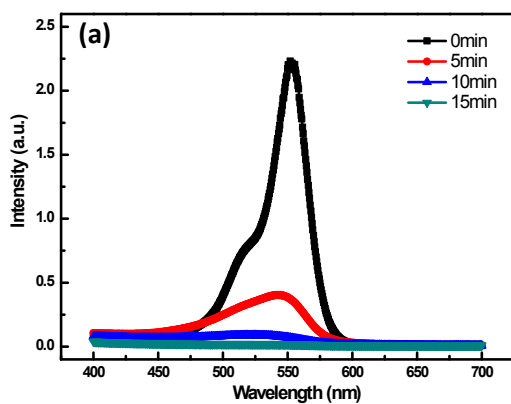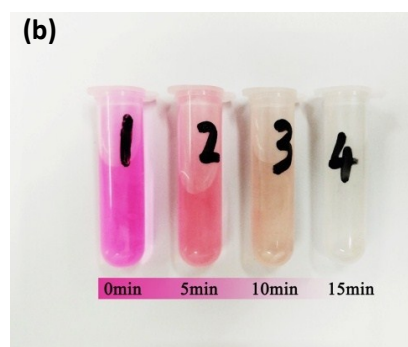

**Fig. S4** (a) UV-vis spectral changes of RhB solutions in the presence of polarized KNbO<sub>3</sub> with the 15 kV/cm polarization voltage, and the corresponding successive colour change of RhB solutions is shown in (b).
